# Supplementary material for: Association of NAFLD with FGF21 Polygenic Hazard Score, and Its Interaction with Protein Intake Level in Korean Adults
Source: MDPI journal article supplement (doi:10.3390/nu15102385), 2023-05-19
Supplement: s1 [file s1]

**Supplementary Table S1.** Information of SNPs in FGF21, FGFR1, FGFR2 and KLB genes

| Gene  | SNP ID     | CHR | Position(hg19)  | Minor allele | Major allele | MAF     | HWE     |
|-------|------------|-----|-----------------|--------------|--------------|---------|---------|
| FGF21 | rs599486   | 19  | chr19:49280035  | T            | C            | 0.01193 | 0.63890 |
|       | rs11670491 | 19  | chr19:49288662  | C            | G            | 0.27580 | 0.14320 |
| FGFR1 | rs2288696  | 8   | chr8:38286225   | A            | G            | 0.09519 | 0.57830 |
|       | rs11777067 | 8   | chr8:38298647   | T            | C            | 0.34680 | 0.20490 |
|       | rs12677355 | 8   | chr8:38329943   | T            | C            | 0.44290 | 0.07024 |
|       | rs881301   | 8   | chr8:38332318   | C            | T            | 0.32440 | 0.90340 |
|       | rs13279569 | 8   | chr8:38341616   | A            | G            | 0.08552 | 0.83830 |
| FGFR2 | rs2420902  | 10  | chr10:122810409 | G            | A            | 0.07279 | 0.13400 |
|       | rs11199734 | 10  | chr10:122819400 | A            | T            | 0.39180 | 0.53210 |
|       | rs2420899  | 10  | chr10:122828846 | G            | T            | 0.28430 | 0.89610 |
|       | rs11199747 | 10  | chr10:122830043 | C            | T            | 0.12270 | 0.84340 |
|       | rs17101395 | 10  | chr10:122837553 | A            | G            | 0.38090 | 0.57290 |
|       | rs17101398 | 10  | chr10:122837580 | T            | A            | 0.14060 | 0.86020 |
|       | rs11819556 | 10  | chr10:122838775 | T            | A            | 0.31700 | 0.60600 |
|       | rs11199756 | 10  | chr10:122841079 | A            | G            | 0.38110 | 0.58840 |
|       | rs2252014  | 10  | chr10:122844482 | A            | G            | 0.31690 | 0.60600 |
|       | rs2252004  | 10  | chr10:122844709 | A            | C            | 0.27840 | 0.85300 |
|       | rs2248282  | 10  | chr10:122852702 | G            | A            | 0.06861 | 0.35970 |
|       | rs2247808  | 10  | chr10:122856670 | A            | T            | 0.06799 | 0.31300 |
|       | rs1948334  | 10  | chr10:122857317 | C            | G            | 0.46860 | 0.32590 |
|       | rs2130790  | 10  | chr10:122864285 | A            | C            | 0.40020 | 0.49230 |
|       | rs11199770 | 10  | chr10:122868170 | A            | G            | 0.20050 | 0.38840 |
|       | rs17101435 | 10  | chr10:122871745 | T            | A            | 0.07048 | 0.80790 |
|       | rs2438673  | 10  | chr10:122872046 | A            | G            | 0.45330 | 0.40260 |
|       | rs11199776 | 10  | chr10:122872265 | A            | G            | 0.44130 | 0.89700 |
|       | rs2243609  | 10  | chr10:122874348 | C            | A            | 0.40440 | 1.00000 |
|       | rs2254079  | 10  | chr10:122875356 | C            | T            | 0.16350 | 0.27640 |
|       | rs10444045 | 10  | chr10:122875446 | C            | T            | 0.20040 | 0.33580 |
|       | rs2250826  | 10  | chr10:122879441 | C            | T            | 0.27530 | 0.43950 |
|       | rs2130779  | 10  | chr10:122879732 | T            | G            | 0.07048 | 0.80790 |
|       | rs2250810  | 10  | chr10:122879869 | T            | C            | 0.27530 | 0.43950 |
|       | rs2250683  | 10  | chr10:122880681 | A            | G            | 0.27530 | 0.43950 |
|       | rs2250682  | 10  | chr10:122880694 | A            | G            | 0.27550 | 0.40890 |
|       | rs11199783 | 10  | chr10:122886721 | G            | C            | 0.24860 | 0.17180 |
|       | rs1907235  | 10  | chr10:122888555 | T            | G            | 0.30150 | 0.11170 |
|       | rs1907236  | 10  | chr10:122888805 | C            | G            | 0.20660 | 0.07975 |
|       | rs1907241  | 10  | chr10:122897984 | G            | T            | 0.33740 | 0.84910 |
|       | rs10430638 | 10  | chr10:122900306 | C            | T            | 0.21040 | 0.44240 |
|       | rs1907243  | 10  | chr10:122900767 | T            | G            | 0.21050 | 0.44240 |
|       | rs1907244  | 10  | chr10:122901064 | G            | A            | 0.21040 | 0.44240 |

|            |    |                 |   |   |         |         |
|------------|----|-----------------|---|---|---------|---------|
| rs2253203  | 10 | chr10:122907292 | T | C | 0.04033 | 0.27160 |
| rs2451877  | 10 | chr10:122911231 | A | G | 0.04033 | 0.27160 |
| rs2130785  | 10 | chr10:122914945 | C | G | 0.04033 | 0.27160 |
| rs17101518 | 10 | chr10:122914969 | G | A | 0.29920 | 0.64800 |
| rs7904102  | 10 | chr10:122916891 | G | C | 0.29930 | 0.64800 |
| rs17101534 | 10 | chr10:122918875 | C | T | 0.29920 | 0.62990 |
| rs11199803 | 10 | chr10:122919079 | G | A | 0.29920 | 0.62990 |
| rs11199805 | 10 | chr10:122919206 | T | C | 0.29930 | 0.64800 |
| rs11199806 | 10 | chr10:122919309 | A | G | 0.29930 | 0.64800 |
| rs6585696  | 10 | chr10:122921563 | G | A | 0.29940 | 0.66650 |
| rs10886861 | 10 | chr10:122921577 | A | C | 0.21060 | 0.46190 |
| rs6585699  | 10 | chr10:122921660 | C | T | 0.29970 | 0.72280 |
| rs7906567  | 10 | chr10:122922458 | C | A | 0.29970 | 0.72280 |
| rs11199809 | 10 | chr10:122923499 | G | A | 0.21050 | 0.46190 |
| rs7897890  | 10 | chr10:122927754 | T | C | 0.27150 | 0.40460 |
| rs11199811 | 10 | chr10:122929073 | A | C | 0.27140 | 0.38950 |
| rs10886863 | 10 | chr10:122929493 | T | C | 0.33980 | 1.00000 |
| rs11199815 | 10 | chr10:122938921 | T | C | 0.20470 | 0.74400 |
| rs7085142  | 10 | chr10:122939374 | C | T | 0.40750 | 0.11280 |
| rs1907285  | 10 | chr10:122943447 | G | A | 0.19910 | 0.07165 |
| rs11199816 | 10 | chr10:122944362 | C | T | 0.19910 | 0.07165 |
| rs11199817 | 10 | chr10:122944426 | A | G | 0.19910 | 0.07165 |
| rs11199826 | 10 | chr10:122954601 | G | C | 0.23390 | 0.21250 |
| rs10788149 | 10 | chr10:122967170 | G | A | 0.25680 | 0.34340 |
| rs10749408 | 10 | chr10:122967526 | C | T | 0.25640 | 0.38730 |
| rs2172071  | 10 | chr10:122968030 | C | T | 0.25630 | 0.37200 |
| rs1907220  | 10 | chr10:122970923 | A | G | 0.25710 | 0.30300 |
| rs17101658 | 10 | chr10:122971522 | C | T | 0.27120 | 0.85060 |
| rs1907221  | 10 | chr10:122972427 | C | T | 0.25770 | 0.27830 |
| rs10510092 | 10 | chr10:122977030 | T | G | 0.18480 | 0.37760 |
| rs1907229  | 10 | chr10:122979684 | A | G | 0.25530 | 0.73710 |
| rs11199839 | 10 | chr10:122989993 | C | T | 0.20640 | 0.43580 |
| rs12220647 | 10 | chr10:122995141 | A | C | 0.27880 | 0.59690 |
| rs11199849 | 10 | chr10:122995312 | C | T | 0.20670 | 0.34710 |
| rs7922045  | 10 | chr10:123001732 | C | T | 0.48680 | 0.41860 |
| rs7899480  | 10 | chr10:123003635 | T | C | 0.45700 | 0.40330 |
| rs7899611  | 10 | chr10:123003689 | T | C | 0.45700 | 0.41550 |
| rs17101702 | 10 | chr10:123003707 | C | G | 0.10350 | 0.00159 |
| rs1873451  | 10 | chr10:123010477 | C | T | 0.49400 | 0.56570 |
| rs11199859 | 10 | chr10:123019551 | T | C | 0.07031 | 0.14220 |
| rs1125527  | 10 | chr10:123019616 | A | G | 0.49370 | 0.45650 |
| rs1125528  | 10 | chr10:123019952 | A | T | 0.27290 | 0.08629 |
| rs4319451  | 10 | chr10:123020251 | G | A | 0.13050 | 0.28100 |

|            |    |                 |   |   |         |         |
|------------|----|-----------------|---|---|---------|---------|
| rs11199862 | 10 | chr10:123022956 | A | G | 0.27200 | 0.22680 |
| rs4751832  | 10 | chr10:123023263 | C | G | 0.31240 | 0.53610 |
| rs10788155 | 10 | chr10:123023456 | C | G | 0.31240 | 0.53610 |
| rs7923130  | 10 | chr10:123026502 | A | G | 0.34690 | 0.42480 |
| rs7922901  | 10 | chr10:123026519 | G | C | 0.34690 | 0.42480 |
| rs11199867 | 10 | chr10:123027404 | T | G | 0.34290 | 0.46450 |
| rs10886885 | 10 | chr10:123030481 | T | G | 0.24650 | 0.88620 |
| rs12247272 | 10 | chr10:123030508 | A | G | 0.04491 | 0.90140 |
| rs11199874 | 10 | chr10:123032519 | A | G | 0.24730 | 0.75340 |
| rs4468286  | 10 | chr10:123034391 | A | C | 0.25220 | 0.86570 |
| rs12413648 | 10 | chr10:123038897 | A | G | 0.20760 | 0.49720 |
| rs10788165 | 10 | chr10:123044214 | G | T | 0.34490 | 0.55620 |
| rs4609533  | 10 | chr10:123061268 | C | T | 0.31950 | 0.24050 |
| rs7097525  | 10 | chr10:123062540 | C | T | 0.31930 | 0.26040 |
| rs11199884 | 10 | chr10:123063174 | A | G | 0.12610 | 0.17640 |
| rs11199900 | 10 | chr10:123077996 | T | A | 0.17300 | 0.33380 |
| rs4752536  | 10 | chr10:123092807 | A | G | 0.35910 | 0.40550 |
| rs7913694  | 10 | chr10:123095186 | A | G | 0.45550 | 0.63710 |
| rs7913828  | 10 | chr10:123095255 | A | G | 0.30980 | 0.82290 |
| rs7895870  | 10 | chr10:123098249 | C | T | 0.39890 | 0.67350 |
| rs10886925 | 10 | chr10:123131571 | A | G | 0.36830 | 0.32570 |
| rs10886926 | 10 | chr10:123131594 | C | T | 0.36880 | 0.30390 |
| rs10886927 | 10 | chr10:123132045 | C | T | 0.31640 | 0.76800 |
| rs9420328  | 10 | chr10:123140661 | C | A | 0.09955 | 0.95270 |
| rs1896404  | 10 | chr10:123141130 | A | T | 0.33250 | 0.70150 |
| rs2420929  | 10 | chr10:123153176 | T | C | 0.46490 | 0.35800 |
| rs17101921 | 10 | chr10:123153295 | A | G | 0.23360 | 0.90540 |
| rs9421422  | 10 | chr10:123154188 | G | C | 0.08614 | 1.00000 |
| rs4457689  | 10 | chr10:123176129 | G | A | 0.37080 | 0.52330 |
| rs4751840  | 10 | chr10:123179594 | G | A | 0.29490 | 0.66380 |
| rs1896413  | 10 | chr10:123181038 | G | A | 0.14030 | 0.92970 |
| rs733521   | 10 | chr10:123183873 | T | G | 0.29460 | 0.29410 |
| rs10788178 | 10 | chr10:123184875 | G | A | 0.28920 | 0.60490 |
| rs2420926  | 10 | chr10:123188264 | C | T | 0.29150 | 0.47100 |
| rs11199964 | 10 | chr10:123193998 | C | T | 0.43310 | 0.74530 |
| rs10886937 | 10 | chr10:123195615 | A | G | 0.25880 | 0.97790 |
| rs3948460  | 10 | chr10:123198212 | A | T | 0.01951 | 0.77660 |
| rs7911028  | 10 | chr10:123198286 | T | G | 0.26180 | 0.56340 |
| rs2162543  | 10 | chr10:123198332 | T | C | 0.23260 | 0.27040 |
| rs6585734  | 10 | chr10:123198490 | T | C | 0.26180 | 0.56340 |
| rs2114691  | 10 | chr10:123198836 | T | C | 0.18530 | 0.14870 |
| rs17096089 | 10 | chr10:123198960 | A | C | 0.21210 | 0.72640 |
| rs7918550  | 10 | chr10:123205203 | C | T | 0.06606 | 0.86310 |

|            |    |                 |   |   |         |         |
|------------|----|-----------------|---|---|---------|---------|
| rs7902280  | 10 | chr10:123205281 | A | G | 0.06601 | 0.73020 |
| rs10788183 | 10 | chr10:123205357 | T | C | 0.18500 | 0.27410 |
| rs11199974 | 10 | chr10:123214477 | G | T | 0.04525 | 0.21790 |
| rs7074862  | 10 | chr10:123216849 | G | C | 0.46140 | 0.34640 |
| rs12776781 | 10 | chr10:123218381 | G | C | 0.28500 | 0.54830 |
| rs1007359  | 10 | chr10:123218471 | A | G | 0.01171 | 0.63560 |
| rs7911727  | 10 | chr10:123224879 | A | G | 0.21270 | 0.84890 |
| rs1619436  | 10 | chr10:123226944 | T | C | 0.24340 | 0.95390 |
| rs2420941  | 10 | chr10:123229626 | G | T | 0.43380 | 0.76180 |
| rs10749418 | 10 | chr10:123235061 | G | T | 0.44850 | 0.41390 |
| rs1649202  | 10 | chr10:123240625 | A | G | 0.42780 | 0.10320 |
| rs2278202  | 10 | chr10:123243197 | A | G | 0.41690 | 0.16810 |
| rs1078806  | 10 | chr10:123338975 | G | A | 0.24840 | 0.30520 |
| rs3135715  | 10 | chr10:123354726 | G | T | 0.27760 | 0.28890 |
| rs1649181  | 10 | chr10:123375856 | T | C | 0.01052 | 1.00000 |
| rs1696813  | 10 | chr10:123377197 | C | A | 0.24260 | 1.00000 |
| rs1219636  | 10 | chr10:123384845 | G | A | 0.01041 | 1.00000 |
| rs10788190 | 10 | chr10:123387029 | G | A | 0.24500 | 0.90840 |
| rs3104685  | 10 | chr10:123391364 | C | G | 0.18670 | 0.83360 |
| rs10466158 | 10 | chr10:123399847 | C | T | 0.14410 | 0.69790 |
| rs11200052 | 10 | chr10:123402237 | T | C | 0.09915 | 0.67710 |
| rs7917459  | 10 | chr10:123402374 | C | T | 0.20000 | 0.48530 |
| rs10749424 | 10 | chr10:123405155 | G | T | 0.44650 | 0.21200 |
| rs10788194 | 10 | chr10:123406645 | G | A | 0.44650 | 0.25410 |
| rs9971131  | 10 | chr10:123431515 | T | G | 0.45460 | 0.60670 |
| rs10510099 | 10 | chr10:123431846 | A | C | 0.11450 | 0.75290 |
| rs3104688  | 10 | chr10:123436465 | T | G | 0.17020 | 0.25890 |
| rs1693688  | 10 | chr10:123436696 | G | T | 0.27340 | 0.91470 |
| rs1696803  | 10 | chr10:123436950 | T | C | 0.17040 | 0.29200 |
| rs1696853  | 10 | chr10:123437207 | G | A | 0.47100 | 0.98300 |
| rs2935718  | 10 | chr10:123437453 | T | C | 0.47100 | 0.98300 |
| rs1693687  | 10 | chr10:123438113 | T | C | 0.47090 | 1.00000 |
| rs17102407 | 10 | chr10:123441100 | G | A | 0.24800 | 0.88670 |
| rs7086628  | 10 | chr10:123442841 | C | G | 0.43540 | 0.98270 |
| rs1219505  | 10 | chr10:123460906 | T | C | 0.23610 | 0.61630 |
| rs1219508  | 10 | chr10:123461654 | T | C | 0.04972 | 0.57440 |
| rs1693682  | 10 | chr10:123463733 | A | G | 0.38710 | 0.39430 |
| rs11200107 | 10 | chr10:123488039 | T | C | 0.22750 | 0.50560 |
| rs11200108 | 10 | chr10:123488067 | C | T | 0.05543 | 0.61110 |
| rs2935706  | 10 | chr10:123491668 | C | G | 0.27880 | 0.29020 |
| rs753455   | 10 | chr10:123494644 | C | T | 0.29460 | 0.66360 |
| rs752736   | 10 | chr10:123495655 | G | C | 0.46440 | 0.76470 |
| rs11200120 | 10 | chr10:123498426 | C | T | 0.47780 | 0.78170 |

---

|     |            |   |               |   |   |         |         |
|-----|------------|---|---------------|---|---|---------|---------|
| KLB | rs900563   | 4 | chr4:39409416 | A | C | 0.35970 | 0.01741 |
|     | rs11940694 | 4 | chr4:39414993 | G | A | 0.40270 | 0.47930 |
|     | rs2608819  | 4 | chr4:39431431 | T | C | 0.17260 | 0.68200 |
|     | rs6854452  | 4 | chr4:39446337 | A | T | 0.39280 | 0.18830 |
|     | rs1458254  | 4 | chr4:39446807 | T | C | 0.05396 | 0.17590 |
|     | rs2687971  | 4 | chr4:39452944 | G | C | 0.44900 | 0.66730 |
|     | rs2687972  | 4 | chr4:39453668 | G | A | 0.44910 | 0.73090 |
|     | rs2608828  | 4 | chr4:39453730 | G | C | 0.29390 | 0.95910 |
|     | rs10517522 | 4 | chr4:39453790 | G | A | 0.39280 | 0.40940 |
|     | rs2608829  | 4 | chr4:39453730 | A | G | 0.44920 | 0.74710 |

---
